# Supplementary material for: Comparative study of the antibacterial effects of wound secretions of different cultivars of Chinese fir
Source: PeerJ. 2024 Aug 16;12:e17850. doi: 10.7717/peerj.17850 (PMC11332385; doi:10.7717/peerj.17850)
Supplement: Supplemental Information 1 — Each data represents a measurement result. [file peerj-12-17850-s001.xlsx]

## Sheet: Raw data
		Escherichia coli inhibition zone diameter（mm）			Against Staphylococcus aureus inhibition zone diamete（mm）			Pseudomonas aeruginosa inhibition zone diamete（mm）			Bacillus subtilis inhibition zone diamete（mm）			Salmonella paratyphi B inhibition zone diamete（mm）
Y3	1	16.39	15.79	16.34	13.9	15.27	15.54	10.94	9.06	10.52	20.55	14	12.91	11.42	13.12	14.9
	2	16.67	14.68	16.65	13.92	15.26	15.97	11.03	8.99	10.69	22.95	14.17	12.74	11.18	13.72	15.27
Mean diameter		16.53	15.235	16.495	13.91	15.265	15.755	10.985	9.025	10.605	21.75	14.085	12.825	11.3	13.42	15.085
		16.0867			14.9767			10.205			16.22			13.2683
CK	1	6	6	6	6	6	6	6	6	6	6	6	6	6	6	6
	2	6	6	6	6	6	6	6	6	6	6	6	6	6	6	6
Mean diameter		6	6	6	6	6	6	6	6	6	6	6	6	6	6	6
		6			6			6			6			6
Y020	1	18.12	17.02	17.03	15.63	15.85	14.85	8.81	8.22	7.4	14.24	15.84	14.41	10.64	10.13	10.4
	2	17.04	17.2	16.9	15.45	15.29	14.69	8.59	8.28	7.41	14.25	15.83	14.52	10.13	10.11	10.36
Mean diameter		17.58	17.11	16.965	15.54	15.57	14.77	8.7	8.25	7.405	14.245	15.835	14.465	10.385	10.12	10.38
		17.2183			15.2933			8.11833			14.8483			10.295
CK	1	6	6	6	6	6	6	6	6	6	6	6	6	6	6	6
	2	6	6	6	6	6	6	6	6	6	6	6	6	6	6	6
Mean diameter		6	6	6	6	6	6	6	6	6	6	6	6	6	6	6
		6			6			6			6			6
HR	1	14.69	19.39	15.62	14.15	14.7	14.76	10.56	13.37	10.58	15.78	20.02	20.22	12.66	12.63	10.63
	2	15.25	19.05	16.57	14.15	14.74	14.14	11.05	13.32	10.6	15.33	19.36	19.9	12.63	12.31	11.21
Mean diameter		14.97	19.22	16.095	14.15	14.72	14.45	10.805	13.345	10.59	15.555	19.69	20.06	12.645	12.47	10.92
		16.7617			14.44			11.58			18.435			12.0117
CK	1	6	6	6	6	6	6	6	6	6	6	6	6	6	6	6
	2	6	6	6	6	6	6	6	6	6	6	6	6	6	6	6
Mean diameter		6	6	6	6	6	6	6	6	6	6	6	6	6	6	6
		6			6			6			6			6
Y061	1	16.89	17.52	18.7	14.46	15.11	15.22	13.29	10.22	9.39	13.17	14.16	18.3	11.31	12.84	12.75
	2	16.17	17.51	18.32	13.54	14.33	15.17	12.82	10.36	9.68	13.23	13.82	19.52	10.97	11.93	12.04
Mean diameter		16.53	17.515	18.51	14	14.72	15.195	13.055	10.29	9.535	13.2	13.99	18.91	11.14	12.385	12.395
		17.5183			14.6383			10.96			15.3667			11.9733
CK	1	6	6	6	6	6	6	6	6	6	6	6	6	6	6	6
	2	6	6	6	6	6	6	6	6	6	6	6	6	6	6	6
Mean diameter		6	6	6	6	6	6	6	6	6	6	6	6	6	6	6
		6			6			6			6			6
CZ	1	18.09	17.96	17.17	15.49	14.96	15.46	10.15	8.43	8.36	11.15	11.93	11.18	11.82	11.43	10.35
	2	18.07	17.27	16.13	14.8	14.97	15.35	10.01	8.76	8.69	11.48	11.12	11.67	11.43	10.6	10.17
Mean diameter		18.08	17.615	16.65	15.145	14.965	15.405	10.08	8.595	8.525	11.315	11.525	11.425	11.625	11.015	10.26
		17.4483			15.1717			9.06667			11.4217			10.9667
CK	1	6	6	6	6	6	6	6	6	6	6	6	6	6	6	6
	2	6	6	6	6	6	6	6	6	6	6	6	6	6	6	6
Mean diameter		6	6	6	6	6	6	6	6	6	6	6	6	6	6	6
		6			6			6			6			6

## Sheet: R
Escherichia coli inhibition zone diameter（mm）			Against Staphylococcus aureus inhibition zone diamete（mm）			Pseudomonas aeruginosa inhibition zone diamete（mm）			Bacillus subtilis inhibition zone diamete（mm）			Salmonella paratyphi B inhibition zone diamete（mm）
diameter	Treat	Species	diameter	Treat	Species	diameter	Treat	Species	diameter	Treat	Species	diameter	Treat	Species
16.39	Chinese fir	Y3	13.9	Chinese fir	Y3	10.94	Chinese fir	Y3	20.55	Chinese fir	Y3	11.42	Chinese fir	Y3
16.67	Chinese fir	Y3	13.92	Chinese fir	Y3	11.03	Chinese fir	Y3	22.95	Chinese fir	Y3	11.18	Chinese fir	Y3
15.79	Chinese fir	Y3	15.27	Chinese fir	Y3	9.06	Chinese fir	Y3	14	Chinese fir	Y3	13.12	Chinese fir	Y3
14.68	Chinese fir	Y3	15.26	Chinese fir	Y3	8.99	Chinese fir	Y3	14.17	Chinese fir	Y3	13.72	Chinese fir	Y3
16.34	Chinese fir	Y3	15.54	Chinese fir	Y3	10.52	Chinese fir	Y3	12.91	Chinese fir	Y3	14.9	Chinese fir	Y3
16.65	Chinese fir	Y3	15.97	Chinese fir	Y3	10.69	Chinese fir	Y3	12.74	Chinese fir	Y3	15.27	Chinese fir	Y3
6	CK	Y3	6	CK	Y3	6	CK	Y3	6	CK	Y3	6	CK	Y3
6	CK	Y3	6	CK	Y3	6	CK	Y3	6	CK	Y3	6	CK	Y3
6	CK	Y3	6	CK	Y3	6	CK	Y3	6	CK	Y3	6	CK	Y3
6	CK	Y3	6	CK	Y3	6	CK	Y3	6	CK	Y3	6	CK	Y3
6	CK	Y3	6	CK	Y3	6	CK	Y3	6	CK	Y3	6	CK	Y3
6	CK	Y3	6	CK	Y3	6	CK	Y3	6	CK	Y3	6	CK	Y3
18.12	Chinese fir	Y020	15.63	Chinese fir	Y020	8.81	Chinese fir	Y020	14.24	Chinese fir	Y020	10.64	Chinese fir	Y020
17.04	Chinese fir	Y020	15.45	Chinese fir	Y020	8.59	Chinese fir	Y020	14.25	Chinese fir	Y020	10.13	Chinese fir	Y020
17.02	Chinese fir	Y020	15.85	Chinese fir	Y020	8.22	Chinese fir	Y020	15.84	Chinese fir	Y020	10.13	Chinese fir	Y020
17.2	Chinese fir	Y020	15.29	Chinese fir	Y020	8.28	Chinese fir	Y020	15.83	Chinese fir	Y020	10.11	Chinese fir	Y020
17.03	Chinese fir	Y020	14.85	Chinese fir	Y020	7.4	Chinese fir	Y020	14.41	Chinese fir	Y020	10.4	Chinese fir	Y020
16.9	Chinese fir	Y020	14.69	Chinese fir	Y020	7.41	Chinese fir	Y020	14.52	Chinese fir	Y020	10.36	Chinese fir	Y020
6	CK	Y020	6	CK	Y020	6	CK	Y020	6	CK	Y020	6	CK	Y020
6	CK	Y020	6	CK	Y020	6	CK	Y020	6	CK	Y020	6	CK	Y020
6	CK	Y020	6	CK	Y020	6	CK	Y020	6	CK	Y020	6	CK	Y020
6	CK	Y020	6	CK	Y020	6	CK	Y020	6	CK	Y020	6	CK	Y020
6	CK	Y020	6	CK	Y020	6	CK	Y020	6	CK	Y020	6	CK	Y020
6	CK	Y020	6	CK	Y020	6	CK	Y020	6	CK	Y020	6	CK	Y020
14.69	Chinese fir	HR	14.15	Chinese fir	HR	10.56	Chinese fir	HR	15.78	Chinese fir	HR	12.66	Chinese fir	HR
15.25	Chinese fir	HR	14.15	Chinese fir	HR	11.05	Chinese fir	HR	15.33	Chinese fir	HR	12.63	Chinese fir	HR
19.39	Chinese fir	HR	14.7	Chinese fir	HR	13.37	Chinese fir	HR	20.02	Chinese fir	HR	12.63	Chinese fir	HR
19.05	Chinese fir	HR	14.74	Chinese fir	HR	13.32	Chinese fir	HR	19.36	Chinese fir	HR	12.31	Chinese fir	HR
15.62	Chinese fir	HR	14.76	Chinese fir	HR	10.58	Chinese fir	HR	20.22	Chinese fir	HR	10.63	Chinese fir	HR
16.57	Chinese fir	HR	14.14	Chinese fir	HR	10.6	Chinese fir	HR	19.9	Chinese fir	HR	11.21	Chinese fir	HR
6	CK	HR	6	CK	HR	6	CK	HR	6	CK	HR	6	CK	HR
6	CK	HR	6	CK	HR	6	CK	HR	6	CK	HR	6	CK	HR
6	CK	HR	6	CK	HR	6	CK	HR	6	CK	HR	6	CK	HR
6	CK	HR	6	CK	HR	6	CK	HR	6	CK	HR	6	CK	HR
6	CK	HR	6	CK	HR	6	CK	HR	6	CK	HR	6	CK	HR
6	CK	HR	6	CK	HR	6	CK	HR	6	CK	HR	6	CK	HR
16.89	Chinese fir	Y061	14.46	Chinese fir	Y061	13.29	Chinese fir	Y061	13.17	Chinese fir	Y061	11.31	Chinese fir	Y061
16.17	Chinese fir	Y061	13.54	Chinese fir	Y061	12.82	Chinese fir	Y061	13.23	Chinese fir	Y061	10.97	Chinese fir	Y061
17.52	Chinese fir	Y061	15.11	Chinese fir	Y061	10.22	Chinese fir	Y061	14.16	Chinese fir	Y061	12.84	Chinese fir	Y061
17.51	Chinese fir	Y061	14.33	Chinese fir	Y061	10.36	Chinese fir	Y061	13.82	Chinese fir	Y061	11.93	Chinese fir	Y061
18.7	Chinese fir	Y061	15.22	Chinese fir	Y061	9.39	Chinese fir	Y061	18.3	Chinese fir	Y061	12.75	Chinese fir	Y061
18.32	Chinese fir	Y061	15.17	Chinese fir	Y061	9.68	Chinese fir	Y061	19.52	Chinese fir	Y061	12.04	Chinese fir	Y061
6	CK	Y061	6	CK	Y061	6	CK	Y061	6	CK	Y061	6	CK	Y061
6	CK	Y061	6	CK	Y061	6	CK	Y061	6	CK	Y061	6	CK	Y061
6	CK	Y061	6	CK	Y061	6	CK	Y061	6	CK	Y061	6	CK	Y061
6	CK	Y061	6	CK	Y061	6	CK	Y061	6	CK	Y061	6	CK	Y061
6	CK	Y061	6	CK	Y061	6	CK	Y061	6	CK	Y061	6	CK	Y061
6	CK	Y061	6	CK	Y061	6	CK	Y061	6	CK	Y061	6	CK	Y061
18.09	Chinese fir	CZ	15.49	Chinese fir	CZ	10.15	Chinese fir	CZ	11.15	Chinese fir	CZ	11.82	Chinese fir	CZ
18.07	Chinese fir	CZ	14.8	Chinese fir	CZ	10.01	Chinese fir	CZ	11.48	Chinese fir	CZ	11.43	Chinese fir	CZ
17.96	Chinese fir	CZ	14.96	Chinese fir	CZ	8.43	Chinese fir	CZ	11.93	Chinese fir	CZ	11.43	Chinese fir	CZ
17.27	Chinese fir	CZ	14.97	Chinese fir	CZ	8.76	Chinese fir	CZ	11.12	Chinese fir	CZ	10.6	Chinese fir	CZ
17.17	Chinese fir	CZ	15.46	Chinese fir	CZ	8.36	Chinese fir	CZ	11.18	Chinese fir	CZ	10.35	Chinese fir	CZ
16.13	Chinese fir	CZ	15.35	Chinese fir	CZ	8.69	Chinese fir	CZ	11.67	Chinese fir	CZ	10.17	Chinese fir	CZ
6	CK	CZ	6	CK	CZ	6	CK	CZ	6	CK	CZ	6	CK	CZ
6	CK	CZ	6	CK	CZ	6	CK	CZ	6	CK	CZ	6	CK	CZ
6	CK	CZ	6	CK	CZ	6	CK	CZ	6	CK	CZ	6	CK	CZ
6	CK	CZ	6	CK	CZ	6	CK	CZ	6	CK	CZ	6	CK	CZ
6	CK	CZ	6	CK	CZ	6	CK	CZ	6	CK	CZ	6	CK	CZ
6	CK	CZ	6	CK	CZ	6	CK	CZ	6	CK	CZ	6	CK	CZ

## Sheet: LSD
Escherichia coli inhibition zone diameter（mm）			Against Staphylococcus aureus inhibition zone diamete（mm）			Pseudomonas aeruginosa inhibition zone diamete（mm）			Bacillus subtilis inhibition zone diamete（mm）			Salmonella paratyphi B inhibition zone diamete（mm）
Treat	value		Treat	value		Treat	value		Treat	value		Treat	value
Y3	16.39		Y3	13.9		Y3	10.94		Y3	20.55		Y3	11.42
Y3	16.67		Y3	13.92		Y3	11.03		Y3	22.95		Y3	11.18
Y3	15.79		Y3	15.27		Y3	9.06		Y3	14		Y3	13.12
Y3	14.68		Y3	15.26		Y3	8.99		Y3	14.17		Y3	13.72
Y3	16.34		Y3	15.54		Y3	10.52		Y3	12.91		Y3	14.9
Y3	16.65		Y3	15.97		Y3	10.69		Y3	12.74		Y3	15.27
Y020	18.12		Y020	15.63		Y020	8.81		Y020	14.24		Y020	10.64
Y020	17.04		Y020	15.45		Y020	8.59		Y020	14.25		Y020	10.13
Y020	17.02		Y020	15.85		Y020	8.22		Y020	15.84		Y020	10.13
Y020	17.2		Y020	15.29		Y020	8.28		Y020	15.83		Y020	10.11
Y020	17.03		Y020	14.85		Y020	7.4		Y020	14.41		Y020	10.4
Y020	16.9		Y020	14.69		Y020	7.41		Y020	14.52		Y020	10.36
HR	14.69		HR	14.15		HR	10.56		HR	15.78		HR	12.66
HR	15.25		HR	14.15		HR	11.05		HR	15.33		HR	12.63
HR	19.39		HR	14.7		HR	13.37		HR	20.02		HR	12.63
HR	19.05		HR	14.74		HR	13.32		HR	19.36		HR	12.31
HR	15.62		HR	14.76		HR	10.58		HR	20.22		HR	10.63
HR	16.57		HR	14.14		HR	10.6		HR	19.9		HR	11.21
Y061	16.89		Y061	14.46		Y061	13.29		Y061	13.17		Y061	11.31
Y061	16.17		Y061	13.54		Y061	12.82		Y061	13.23		Y061	10.97
Y061	17.52		Y061	15.11		Y061	10.22		Y061	14.16		Y061	12.84
Y061	17.51		Y061	14.33		Y061	10.36		Y061	13.82		Y061	11.93
Y061	18.7		Y061	15.22		Y061	9.39		Y061	18.3		Y061	12.75
Y061	18.32		Y061	15.17		Y061	9.68		Y061	19.52		Y061	12.04
CZ	18.09		CZ	15.49		CZ	10.15		CZ	11.15		CZ	11.82
CZ	18.07		CZ	14.8		CZ	10.01		CZ	11.48		CZ	11.43
CZ	17.96		CZ	14.96		CZ	8.43		CZ	11.93		CZ	11.43
CZ	17.27		CZ	14.97		CZ	8.76		CZ	11.12		CZ	10.6
CZ	17.17		CZ	15.46		CZ	8.36		CZ	11.18		CZ	10.35
CZ	16.13		CZ	15.35		CZ	8.69		CZ	11.67		CZ	10.17

## Sheet: Sheet1
Escherichia coli inhibition zone diameter（mm）			Against Staphylococcus aureus inhibition zone diamete（mm）			Pseudomonas aeruginosa inhibition zone diamete（mm）			Bacillus subtilis inhibition zone diamete（mm）			Salmonella paratyphi B inhibition zone diamete（mm）
data$value groups			data$value groups			data$value groups			data$value groups			data$value groups
Y061 17.51833 a			Y020 15.29333 a			HR 11.580000 a			HR 18.43500 a			Y3 13.26833 a
CZ 17.44833 a			CZ 15.17167 a			Y061 10.960000 ab			Y3 16.22000 ab			HR 12.01167 b
Y020 17.21833 ab			Y3 14.97667 ab			Y3 10.205000 bc			Y061 15.36667 b			Y061 11.97333 b
HR 16.76167 ab			Y061 14.63833 ab			CZ 9.066667 cd			Y020 14.84833 b			CZ 10.96667 bc
Y3 16.08667 b			HR 14.44000 b			Y020 8.118333 d			CZ 11.42167 c			Y020 10.29500 c
